# Supplementary material for: Trans- and Within-Generational Developmental Plasticity May Benefit the Prey but Not Its Predator during Heat Waves
Source: MDPI journal article supplement (doi:10.3390/biology11081123), 2022-07-27
Supplement: s1 [file s1]

## Supplementary material

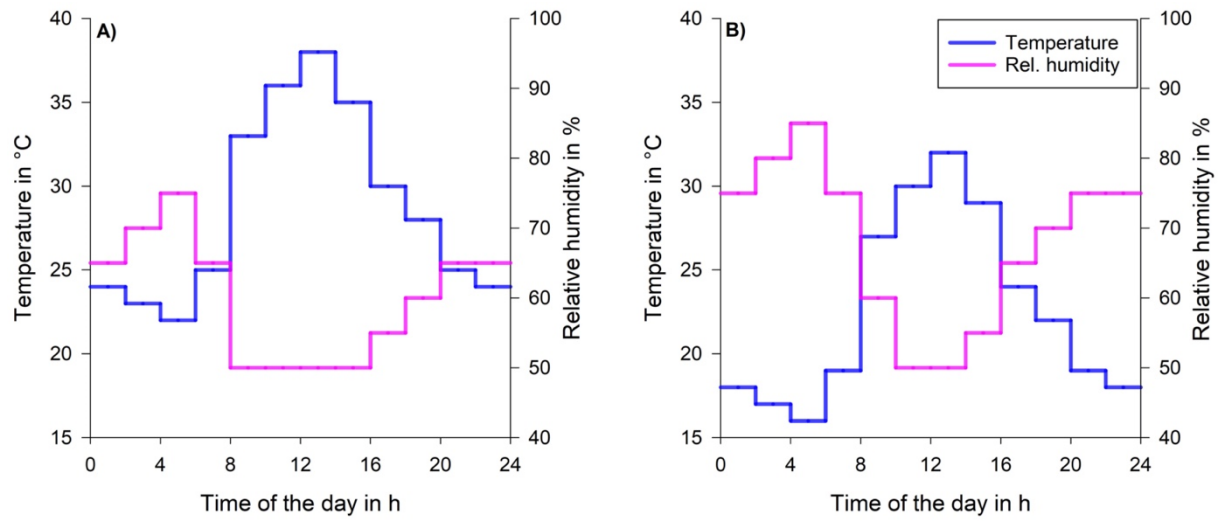

**Figure S1.** Diurnal variations in temperature (blue lines) and humidity (pink lines) mimicking extreme (A) and mild (B) heat waves at long-day conditions (L:D = 16h:8h) (mild heat waves:  $T_{\text{mean}} = 22.6^{\circ}\text{C}$ ,  $T_{\text{max}} = 32.0^{\circ}\text{C}$ ,  $T_{\text{min}} = 16^{\circ}\text{C}$ ,  $\text{RH}_{\text{mean}} = 67.9\%$ ,  $\text{RH}_{\text{max}} = 85.0\%$ ,  $\text{RH}_{\text{min}} = 50.0\%$ ; extreme heat waves:  $T_{\text{mean}} = 28.6^{\circ}\text{C}$ ;  $T_{\text{max}} = 38.0^{\circ}\text{C}$ ,  $T_{\text{min}} = 22.0^{\circ}\text{C}$ ;  $\text{RH}_{\text{mean}} = 60.0\%$ ,  $\text{RH}_{\text{max}} = 75.0\%$ ,  $\text{RH}_{\text{min}} = 50.0\%$ ).
